# Supplementary material for: PKMYT1 kinase ameliorates cisplatin sensitivity in osteosarcoma
Source: Springer Nature journal article supplement (doi:10.1038/s41392-025-02250-7), 2025-05-20

Figure 1M

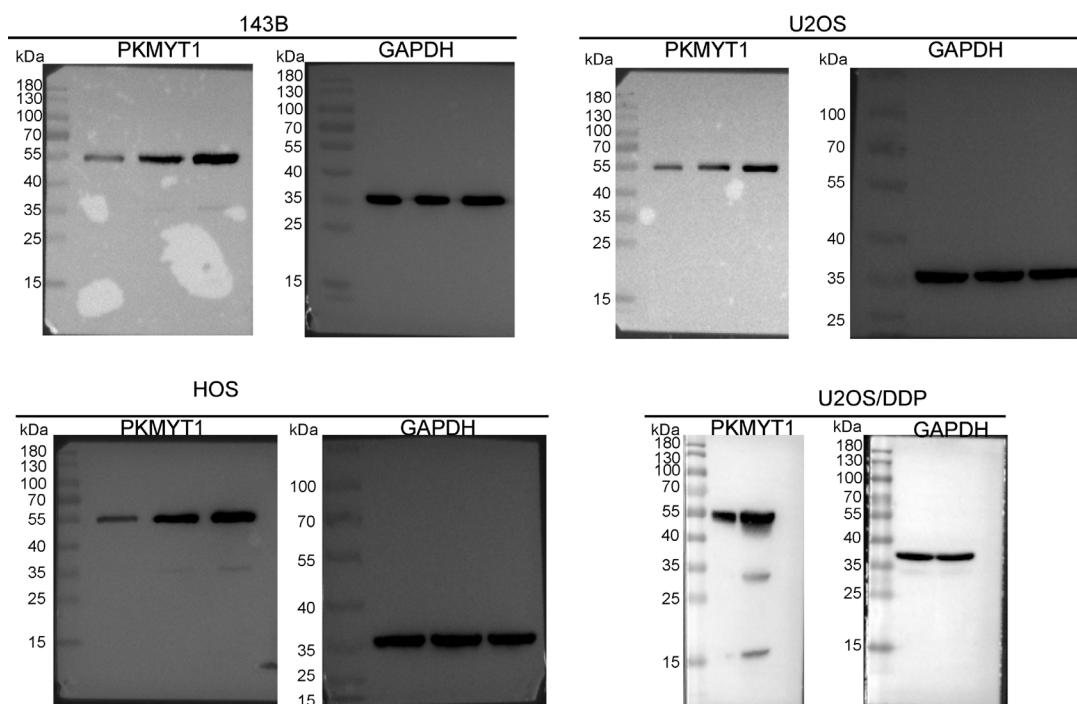

Figure 2A

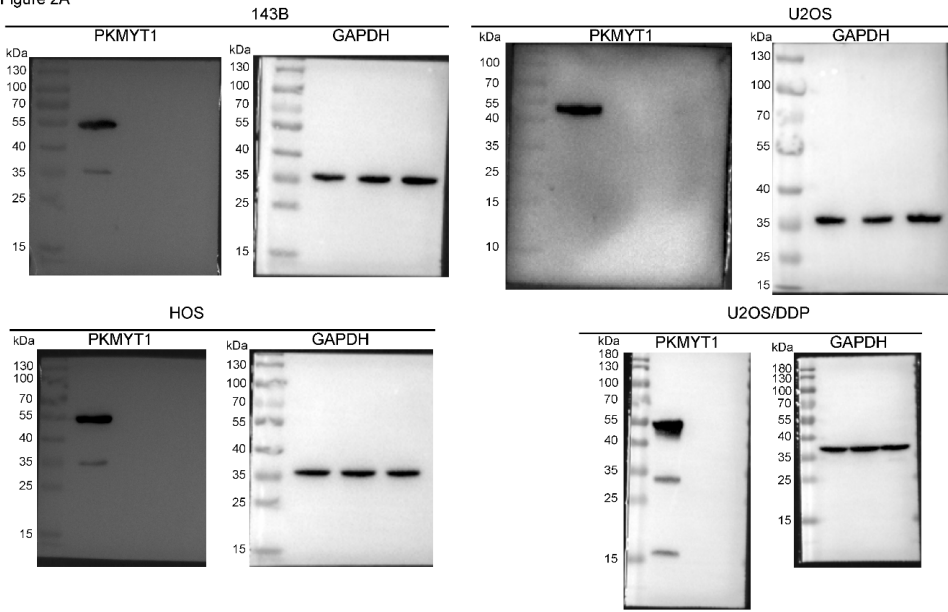

Figure 3

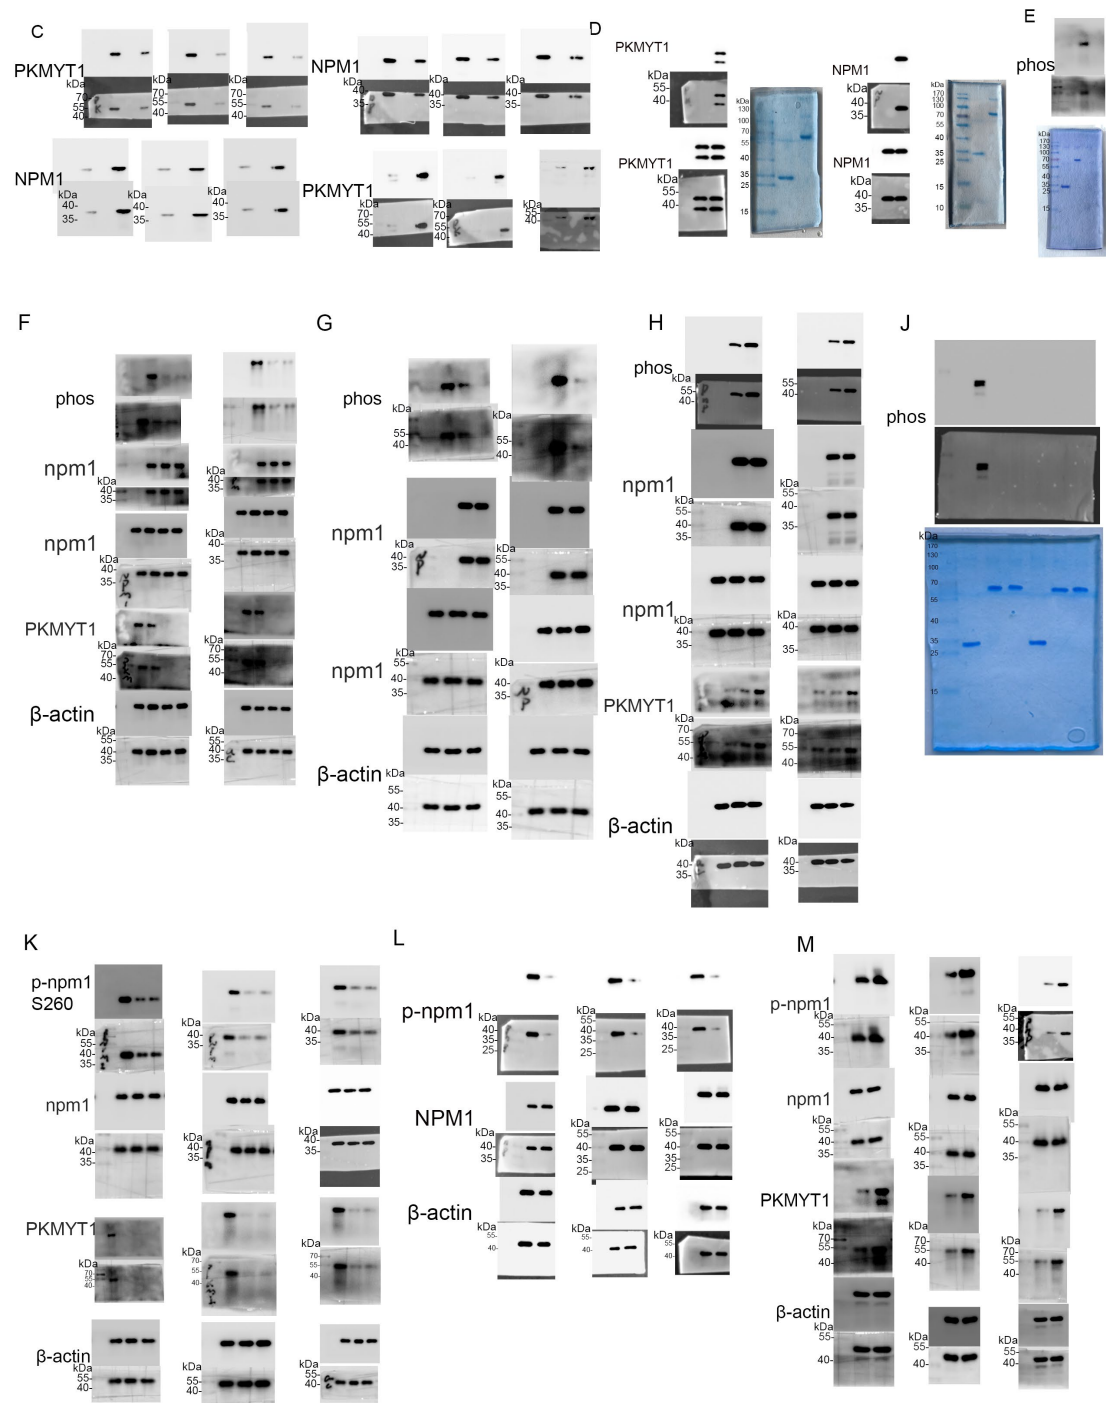

Figure 4A

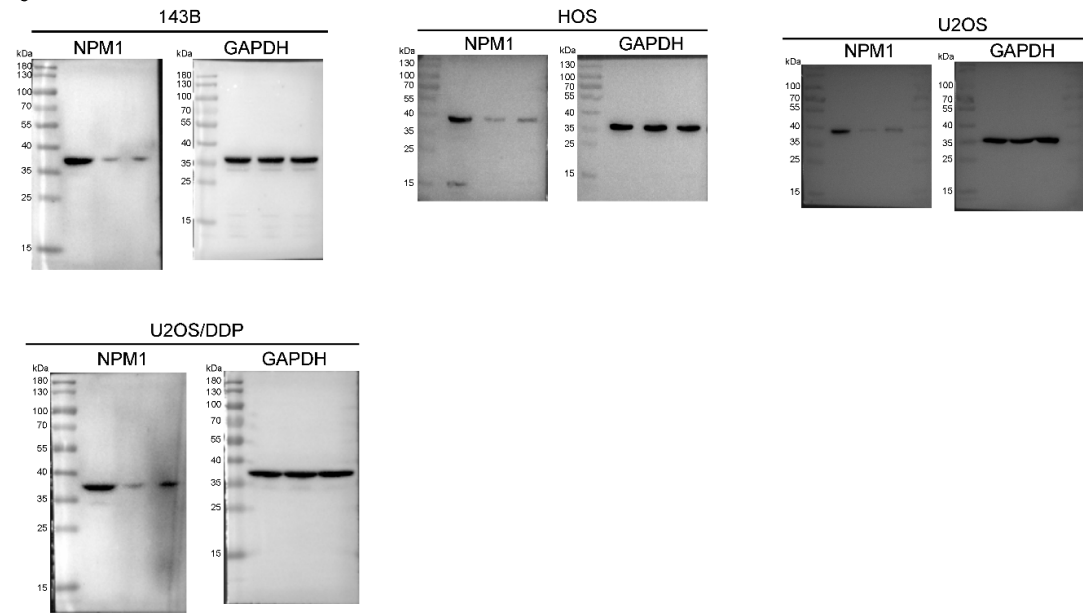

Figure 5

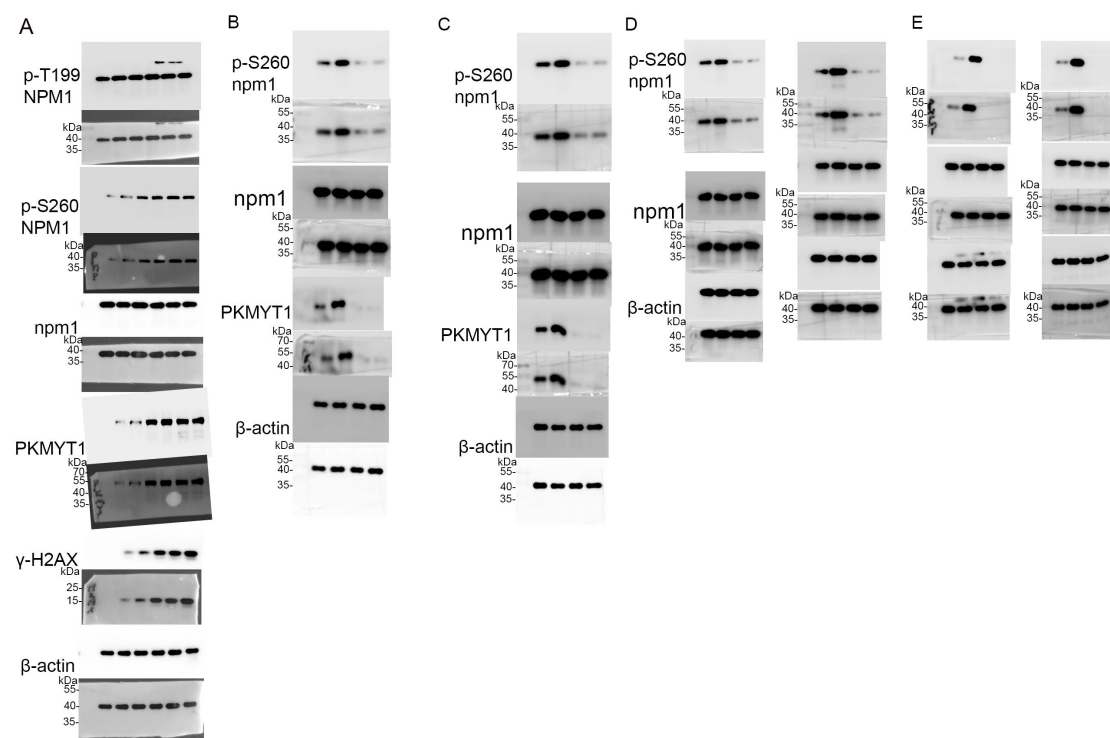

Figure 5

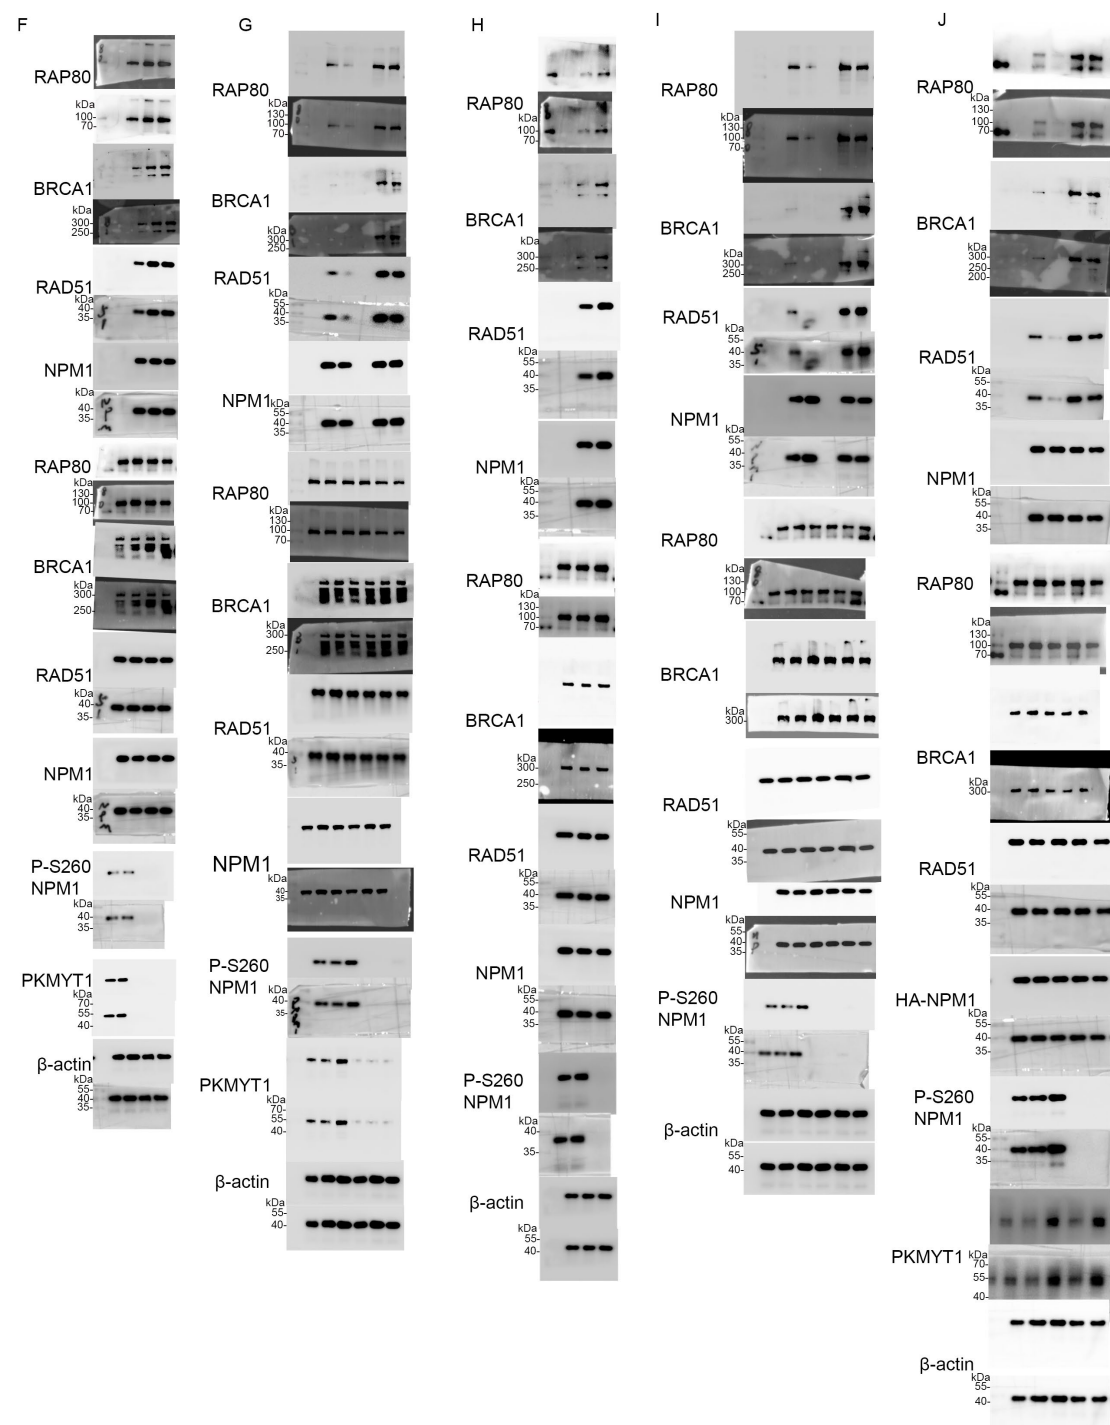

Figure 6

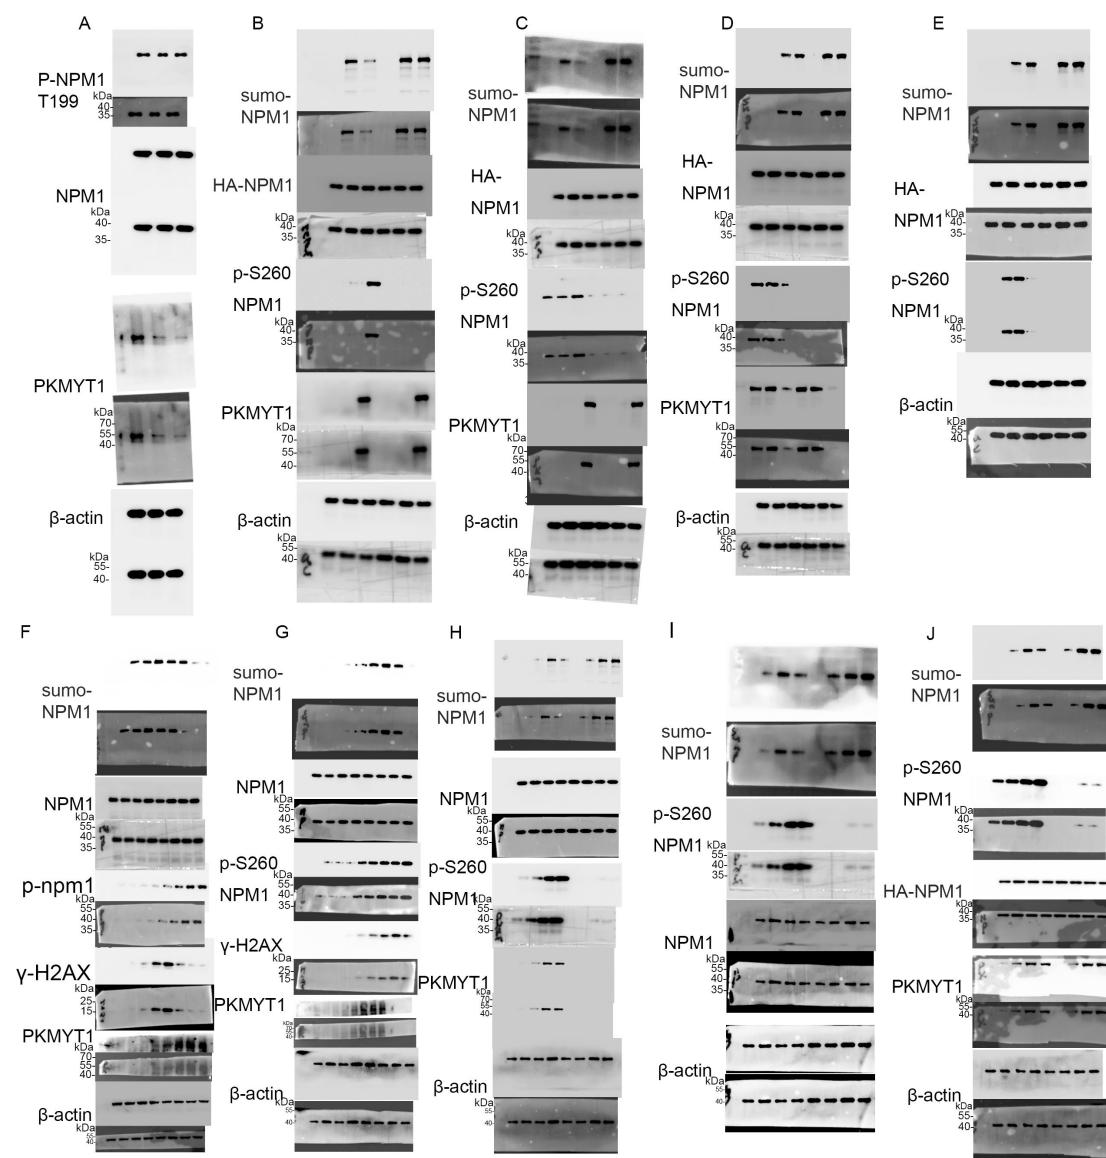

Supplementary Figure 2

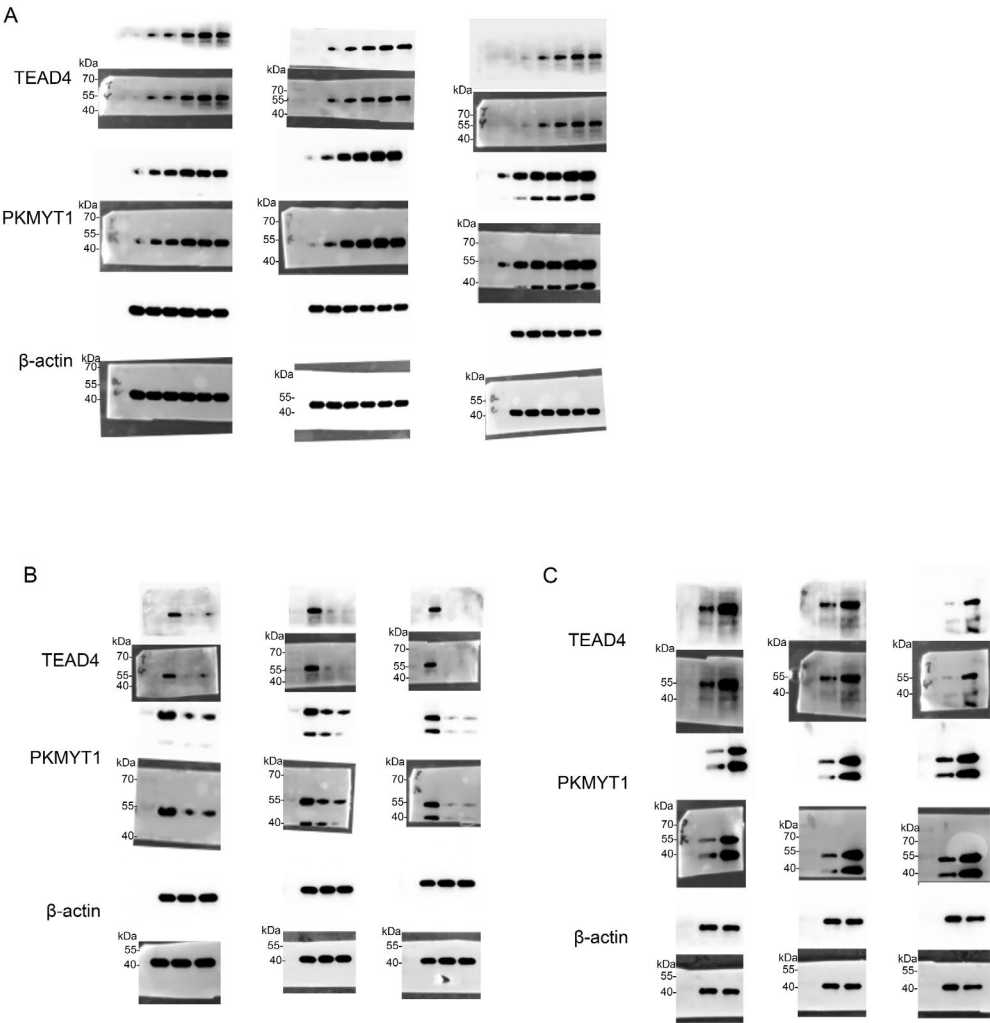



Supplementary Figure 3

Figure S4

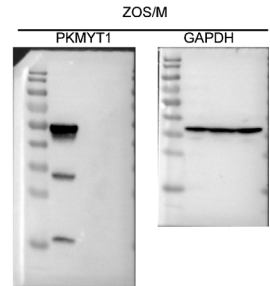

Supplementary Figure 5

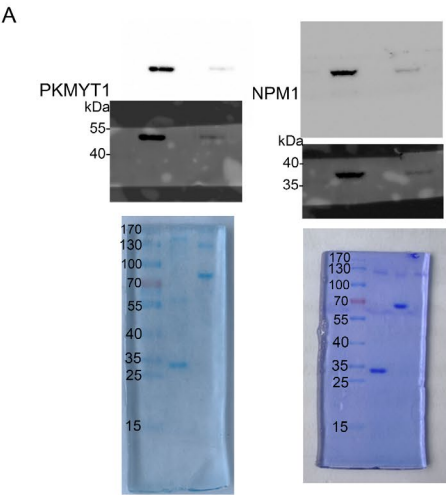

Supplementary Figure 8

A

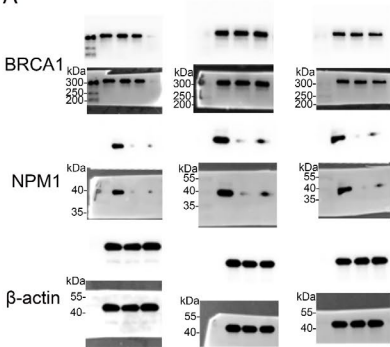

B

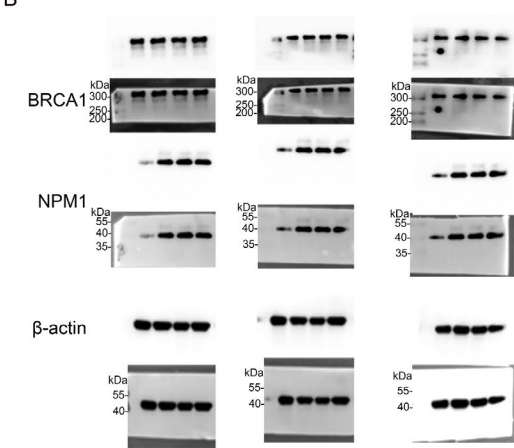

Supplement: MOESM2 [file 41392_2025_2250_MOESM2_ESM.pdf]
